# Supplementary material for: Mapping the single-cell landscape of acral melanoma and analysis of the molecular regulatory network of the tumor microenvironments
Source: eLife journal article supplement (doi:10.7554/elife.78616), 2022-07-27
Supplement: fig3-figsupp1-data1 [file 20160819 invasionͳ.xlsx]

## Sheet: Sheet1
ctrl	1	2	3		TWIST1	1	2	3
1	26	35	115		1	68	49	163
2	53	50	57		2	198	12	85
3	62	74	80		3	46	168	205
4	18	44	209		4	127	239	300
5	158	35	197		5	80	157	117
6	184	33	99		6	126	121	238
7	104	89	111		7	125	200	300
8	151	10	6		8	137	216	145
9	57	24			9	27	235	200
					10	189	173	300
					11	48	136	180
					12	138	189	200
					13	91	160	300
					14	145	240	112
					15		101	45
					16		97
					17		13
					18		97
	813	394	874		19		21
						1545	2624	2890
					average	stdev
	A375-control	813	394	874	693.667	213.355	0.0431931
	A375-TWIST1	1545	2624	2890	2353	581.571
								average	stdev
	A375-ctrl	480	471	67	813	394	874	516.5	269.622	0.000163136
	A375-TWIST1	3388	3354	2659	1545	2624	2890	2743.33	614.732
