# Supplementary material for: Mapping the single-cell landscape of acral melanoma and analysis of the molecular regulatory network of the tumor microenvironments
Source: eLife journal article supplement (doi:10.7554/elife.78616), 2022-07-27
Supplement: fig3-figsupp1-data1 [file elife-78616-fig3-figsupp1-data1-v2.zip]

## Sheet: pcDNA1
0h	12h	24h	48h		24h	48h
243.28		232.47	218.62		0.0444344	0.101365
267.93		252.63	238.14		0.0571045	0.111186
282.75		264.91	252.63		0.0630946	0.106525
274.98		263.64	246.03		0.0412394	0.10528
174.01		165.79	144.72		0.0472387	0.168324
183.12		167.11	159.2		0.087429	0.130625
					0.0567568	0.120551

## Sheet: pcDNA2
0h	12h	24h	48h		24h	48h
296.06		264.91	255.24		0.105215	0.137877
228.19		218.4	208.1		0.0429028	0.0880407
228.57		201.3	196.05		0.119307	0.142276
224.36		211.67	198.67		0.0565609	0.114503
178.68		165.79	151.2		0.0721401	0.153794
142.86		123.68	109.7		0.134257	0.232115
				c	0.0883972	0.144768

## Sheet: PCdna3
0h	12h	24h	48h		24h	48h
160.53		133.72	120.48		0.167009	0.249486
190.67		153.83	138.15		0.193213	0.27545
205.08		181.58	166.22		0.114589	0.189487
255.96		235.53	228.93		0.0798172	0.105602
287.88		271.05	259.53		0.0584619	0.0984785
310		281.55	264.45		0.0917742	0.146935
					0.117478	0.177573

## Sheet: TWIST1
0h	12h	24h	48h		24h	48h
232.45		126.32	59.74		0.456571	0.742998
220.76		107.89	48.68		0.511279	0.779489
232.47		88.16	33.77		0.620768	0.854734
361.01		215.7	157.56		0.40251	0.563558
376		253.95	194.74		0.324601	0.482074
238.16		135.51	93.42		0.431013	0.607743
276.32		135.54	110.52		0.509482	0.600029
					0.465175	0.661518

## Sheet: TWIST2
190.77		93.41	38.06		0.510353	0.800493
188.16		106.5	30.87		0.433992	0.835938
206.5		110.53	63.16		0.464746	0.69414
349.7		256.58	173.67		0.266285	0.503374
302.6		236.84	190.79		0.217317	0.369498
181.58		97.37	32.89		0.463763	0.818868
					0.392743	0.670385

## Sheet: TWIST3
0h	12h	24h	48h		24h	48h
123.67		0	0		1	1
201.3		81.82	21.05		0.593542	0.89543
290.91		188.3	119.64		0.352721	0.588739
224.98		121	78.95		0.462174	0.64908
224.92		110.53	50		0.508581	0.777699
					0.583404	0.782189

## Sheet: Sheet1
			0h
pcDNA	pcDNA1	0h	0		0	0
	pcDNA2	0h	0
	pcDNA3	0h	0						0.0544791	0.027438	#NUM!
TWIST1	TWIST1	0h	0		0	0
	TWIST2	0h	0
	TWIST3	0h	0
	pcDNA1	24h	0.0567568	5.67568	8.75438	3.03694		8.75	48.04
	pcDNA2	24h	0.0883972	8.83972				14.76	70.47
	pcDNA3	24h	0.117478	11.7478
	TWIST1	24h	0.465175	46.5175	48.044	9.62428
	TWIST2	24h	0.392743	39.2743
	TWIST3	24h	0.583404	58.3404
	pcDNA1	48h	0.120551	12.0551	14.7631	2.86188
	pcDNA2	48h	0.144768	14.4768
	pcDNA3	48h	0.177573	17.7573
	TWIST1	48h	0.661518	66.1518	70.4697	6.72563
	TWIST2	48h	0.670385	67.0385
	TWIST3	48h	0.782189	78.2189
