# Supplementary material for: Mapping the single-cell landscape of acral melanoma and analysis of the molecular regulatory network of the tumor microenvironments
Source: eLife journal article supplement (doi:10.7554/elife.78616), 2022-07-27
Supplement: fig3-figsupp1-data1 [file TWIST1 migration 20151111.xlsx]

## Sheet: Sheet1
ctrl	1	2	3			TWIST1	1	2	3
1	39	12	71			1	56	106	187
2	41	25	64			2	44	88	91
3	3	40	25			3	54	36	90
4	15	59	19			4	46	34	41
5	6	138	10			5	122	58	57
6	17	28	16			6	163	138	35
7	3	36	17			7	59	55	71
8	6	56	34			8	49	19	69
9	8	28	103			9	38	35	124
10	5	45	27			10	53	92	68
11	2	29	22			11	86	41	78
12	41	109	18			12	29	112	66
13	93	18	7			13	38	40	49
	279	623	433				837	854	1026
average	445						905.667
stdev	172.314						104.558
TTEST-1	0.0120763
TTEST-2	0.0241526
			ctrl	445		172.314
			TWIST1	905.667		104.558
