# Supplementary material for: Mapping the single-cell landscape of acral melanoma and analysis of the molecular regulatory network of the tumor microenvironments
Source: eLife journal article supplement (doi:10.7554/elife.78616), 2022-07-27
Supplement: fig7-data1 [file 4.20statistics.xlsx]

## Sheet: Sheet1
A375-CTGF(0ng/ml)	A375-CTGF(50ng/ml)
60	78
79	97
60	72
	0.0152681
