# Supplementary material for: Mapping the single-cell landscape of acral melanoma and analysis of the molecular regulatory network of the tumor microenvironments
Source: eLife journal article supplement (doi:10.7554/elife.78616), 2022-07-27
Supplement: fig7-data2 [file A375-CTGF.xlsx]

## Sheet: Sheet1
A3-0			A3-50
1	2	3	1	2	3
34	42	16	69	21	50
36	59	28	40	43	52
34	44	27	35	44	122
16	18	35	36	71	80
6	10	55	42	65	66
24	22	28	52	65	58
19	11	23	35	36	72
43	43	21	43	55	126
52	24	55	27	25	34
29	24	47	48	62	17
293	297	335	427	487	677
308.333			530.333
