# Supplementary figures and images for: Fidelity - Our Greatest Gift to Others
Source: eLife journal article supplement (doi:10.7554/elife.78616), 2009-02-09

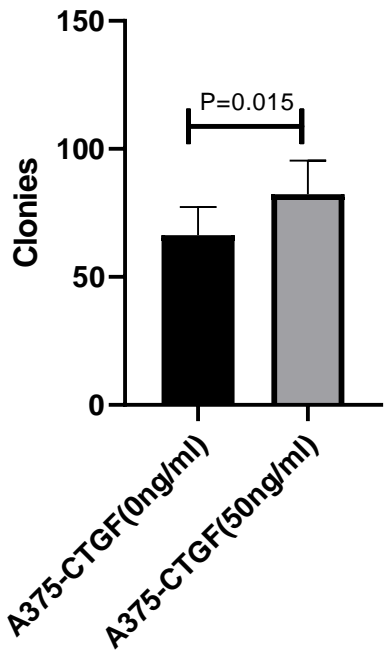

Supplement: fig7-data1 [file elife-78616-fig7-data1-v3.zip]

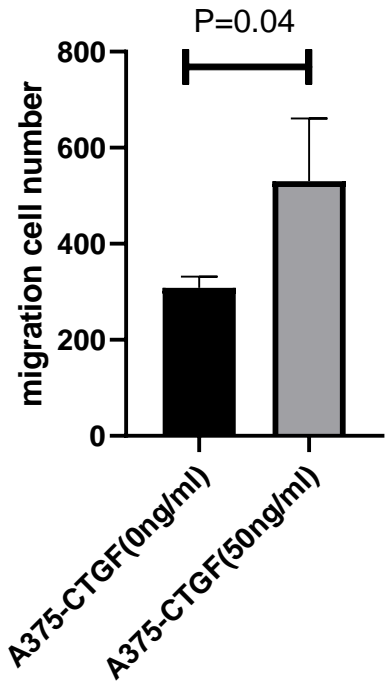

Supplement: fig7-data2 [file elife-78616-fig7-data2-v3.zip]
